# Supplementary material for: Comparison of different modes of antibiotic delivery on gut microbiota depletion efficiency and body composition in mouse
Source: PubMed Central journal article supplement (PMC7657353; doi:10.1186/s12866-020-02018-9), 2020-11-11
Supplement: 12866_2020_2018_MOESM1_ESM.pdf [file 12866_2020_2018_MOESM1_ESM.pdf]

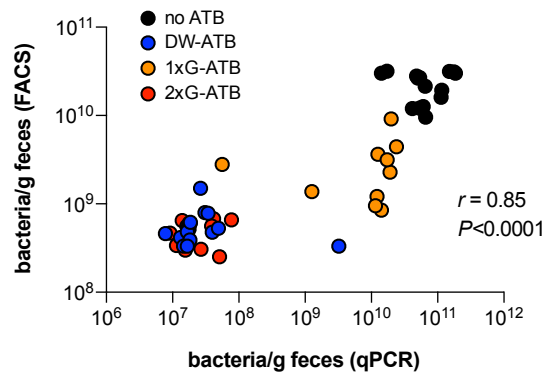

**Figure S1: Comparison between flow cytometry and qPCR-based quantifications of fecal bacterial densities.**

Analysis by both flow cytometry and qPCR-based methods of 54 fecal samples collected from mice treated or not with antibiotics during 4, 7 or 12 days. The bacterial densities measured by these two methods are strongly correlated (Spearman's correlation coefficient  $r=0.85$ ; two-tailed  $P<0.0001$ ).
